# Supplementary material for: Phosphate sorption and desorption by two contrasting volcanic soils of equatorial Africa
Source: PeerJ. 2018 Oct 23;6:e5820. doi: 10.7717/peerj.5820 (PMC6202954; doi:10.7717/peerj.5820)
Supplement: Data S1 [file peerj-06-5820-s001.xlsx]

## Sheet: DESORCIÓN
	RWANDA
			SORPTION										DESORPTION										P in solid phase after desorption
	ADDED CONCENTRATION	DRY WEIGHT	equilibrium concentracion				sorbed concentracion					WEIGHT AFTER SORPTION	equilibrium concentracion				P desorbed		means P desorbed	SD
	mg/l	g	ug/l	µmol L-1			µg P/g soil	µmol P g-1		% sorption		g	ug/l	µmol L-1	mol L-1		µg P/g soil	µmol P g-1	µg P/g soil		% desorbed		µmol P g-1
	0	0.4962	143.668	4.63834	1.53436	0	-2.89537	-0.0934773	0			0.9787	377.546	12.1891	1.21891e-05	2.50054	7.83617	0.252992	7.36231	0.922925			-0.346469	0
	0	0.5201	132.531	4.27878	1.45367	10	-2.54818	-0.0822684	8.94792			1.0351	399.82	12.9083	1.29083e-05	2.55787	7.95204	0.256733	6.70134	0.603801			-0.339001	5.53811
	0	0.5032	188.216	6.07659	1.80444	20	-3.74039	-0.120759	15.6606			1.0115	310.724	10.0318	1.00318e-05	2.30576	6.29871	0.203355	6.20717	0.715222			-0.324114	20.7971
	1.95789	0.5026	143.668	4.63834	1.53436	30	36.0968	1.16539	19.5872	92.6621		0.9811	310.724	10.0318	1.00318e-05	2.30576	6.34138	0.204732	6.02775	0.404517	17.5677		0.960659	29.723
	1.95789	0.5235	154.805	4.9979	1.60902	40	34.443	1.112	22.3732	92.0933		1.2003	321.861	10.3913	1.03913e-05	2.34097	6.36423	0.20547	6.78887	0.635272	18.4776		0.906526	36.056
	1.95789	0.5233	266.176	8.59352	2.15101	50	32.3279	1.04371	24.5342	86.405	90.3868	1.3865	377.546	12.1891	1.21891e-05	2.50054	7.39843	0.238859	10.7964	0.69324	22.8856	19.6436	0.804852	40.9683
	3.91579	0.4985	188.216	6.07659	1.80444	60	74.7758	2.41415	26.2999	95.1934		1.0938	277.313	8.95308	8.95308e-06	2.192	5.66934	0.183035	19.0407	0.646234	7.58179		2.23111	44.9819
	3.91579	0.5084	165.942	5.35747	1.67849	70	73.7578	2.38128	27.7927	95.7622		1.2213	344.135	11.1105	1.11105e-05	2.40789	7.01885	0.226605	17.1412	5.17219	9.51608		2.15468	48.3754
	3.91579	0.5021	177.079	5.71703	1.74345	80	74.4615	2.404	29.0859	95.4778	95.4778	1.3517	288.45	9.31264	9.31264e-06	2.23137	5.93332	0.191558			7.96831	8.35539	2.21244	51.3149
	9.78947	0.4967	221.627	7.15527	1.96785	100	192.628	6.21903	31.2468	97.7361		1.295	299.587	9.6722	9.6722e-06	2.26926	6.15684	0.198775			3.19623		6.02026
	9.78947	0.5058	221.627	7.15527	1.96785	200	189.163	6.10714	37.9595	97.7361		1.6909	310.724	10.0318	1.00318e-05	2.30576	6.35197	0.205074			3.35794		5.90207
	9.78947	0.499	266.176	8.59352	2.15101	300	190.848	6.16154	41.8861	97.281	97.5844	1.2642	277.313	8.95308	8.95308e-06	2.192	5.57445	0.179972			2.92089	3.15835	5.98157
	19.5789	0.5006	332.998	10.7509	2.37499	400	384.458	12.4123	44.6721	98.2992		1.091	366.409	11.8296	1.18296e-05	2.4706	7.35881	0.23758			1.91407		12.1747
	19.5789	0.5146	355.272	11.47	2.43974	500	373.565	12.0606	46.8331	98.1854		1.1221	355.272	11.47	1.147e-05	2.43974	6.90385	0.222892			1.8481		11.8377
	19.5789	0.4973	410.957	13.2678	2.58534	600	385.441	12.444	48.5988	97.901	98.1286	1.213	310.724	10.0318	1.00318e-05	2.30576	6.10397	0.197067			1.58363	1.78193	12.247
	39.1579	0.5024	1201.69	38.7967	3.65833	700	755.498	24.3914	50.0916	96.9312		1.1133	566.876	18.3017	1.83017e-05	2.90699	10.5115	0.339364			1.39133		24.052								A (L/g)
	39.1579	0.5169	1257.37	40.5945	3.70363	800	733.227	23.6723	51.3848	96.789		1.195	578.013	18.6612	1.86612e-05	2.92645	10.2911	0.332249			1.40353		23.3401							A. silandico	0.251925
	39.1579	0.5105	1457.84	47.0666	3.85156		738.493	23.8423		96.277	96.6657	1.1665	644.836	20.8186	2.08186e-05	3.03585	11.5867	0.374079			1.56897	1.45461	23.4683							A. vitrico	0.136662
	58.7368	0.4966	3328.87	107.473	4.67724		1115.75	36.022		94.3326		1.1386	1112.59	35.9202	3.59202e-05	3.5813	19.539	0.63082			1.75121		35.3912
	58.7368	0.5103	3239.77	104.596	4.65011		1087.54	35.1113		94.4843		1.062	1101.46	35.5606	3.55606e-05	3.57124	19.2727	0.622221			1.77214		34.4891
	58.7368	0.5112	3139.54	101.36	4.61868		1087.58	35.1128		94.6549	94.4906	1.0353	1045.77	33.7628	3.37628e-05	3.51936	18.3106	0.591159			1.6836	1.73565	34.5217
	97.8947	0.5097	22259.4	718.648	6.57737		1483.92	47.9085		77.2619		1.2617	2215.16	71.5168	7.15168e-05	4.26993	13.8873	0.448352			0.935851		47.4602
	97.8947	0.5064	23212.9	749.432	6.61932		1474.76	47.6128		76.2879		1.2819	2348.81	75.8315	7.58315e-05	4.32851	14.4312	0.465912			0.978543		47.1469
	97.8947	0.5146	22047.5	711.807	6.56781		1473.91	47.5853		77.4784	77.0094	0.9967	2148.34	69.3594	6.93594e-05	4.2393	23.1053	0.745958			1.56762	1.16067	46.8393
	SAO TOMÉ & PRÍNCIPE
			SORPTION										DESORPTION										P in solid phase after desorption
	ADDED CONCENTRATION	DRY WEIGHT	equilibrium concentracion				sorbed concentracion					WEIGHT AFTER SORPTION	equilibrium concentracion				P desorbed		means P desorbed	SD
	mg/l	g	ug/l	µmol L-1			µg P/g soil	µmol P g-1		% sorption		g	ug/l	µmol L-1	mol L-1		µg P/g soil	µmol P g-1	µg P/g soil		% desorbed		µmol P g-1
	0	0.5547	388.683	12.5487	2.52962	0	-7.00709	-0.226225	0			1.1	377.546	12.1891	0.393528	2.50054	6.79537	0.219389	6.3078	0.437935			-0.445614	0
	0	0.5173	355.272	11.47	2.43974	10	-6.86782	-0.221728	2.59321			1.1634	321.861	10.3913	0.335485	2.34097	6.18021	0.199529	6.56994	0.414137			-0.421257	0.521703
0	0	0.5561	366.409	11.8296	2.4706	20	-6.58891	-0.212724	8.34807			1.2262	332.998	10.7509	0.347094	2.37499	5.94784	0.192027	7.09737	0.111263			-0.404751	11.2211
	1.95789	0.5117	332.998	10.7509	2.37499	30	31.7549	1.02521	11.7144	82.992		1.1299	321.861	10.3913	0.335485	2.34097	6.27658	0.20264	7.6711	0.340539	19.7657		0.82257	17.4799
	1.95789	0.5013	344.135	11.1105	2.40789	40	32.1915	1.03931	14.1029	82.4232		1.1978	321.861	10.3913	0.335485	2.34097	6.38958	0.206288	13.7046	4.87551	19.8487		0.833019	21.9205
2	1.95789	0.5184	388.683	12.5487	2.52962	50	30.2703	0.97728	15.9556	80.1479	81.8544	1.0863	366.409	11.8296	0.381919	2.4706	7.04368	0.227406	24.3762	1.36267	23.2693	20.9612	0.749874	25.365
	3.91579	0.4965	399.82	12.9083	2.55787	60	70.8151	2.28628	17.4693	89.7895		1.0085	355.272	11.47	0.370311	2.43974	7.10959	0.229534	33.1608	5.30679	10.0397		2.05674	28.1793
	3.91579	0.5081	366.409	11.8296	2.4706	70	69.8559	2.25531	18.7491	90.6428		1.0402	355.272	11.47	0.370311	2.43974	6.98051	0.225367	31.1289	6.92641	9.99272		2.02994	30.5588
4	3.91579	0.5107	344.135	11.1105	2.40789	80	69.9364	2.25791	19.8578	91.2116	90.548	1.1384	366.409	11.8296	0.381919	2.4706	7.20202	0.232518			10.298	10.1101	2.02539	32.62
	9.78947	0.5211	377.546	12.1891	2.50054	100	180.617	5.83123	21.7104	96.1433		1.1422	388.683	12.5487	0.405136	2.52962	7.47217	0.24124			4.13704		5.58999	36.0644
	9.78947	0.5139	455.506	14.7061	2.68826	200	181.63	5.86395	27.4653	95.347		1.1798	388.683	12.5487	0.405136	2.52962	7.47682	0.24139			4.11651		5.62256	46.7638
10	9.78947	0.4975	377.546	12.1891	2.50054	300	189.184	6.10785	30.8317	96.1433	95.8779	1.1167	399.82	12.9083	0.416745	2.55787	8.06431	0.260358			4.26267	4.17207	5.84749
	19.5789	0.3962	1056.91	34.1224	3.52995	400	467.492	15.0931	33.2201	94.6018		0.8513	778.48	25.1333	0.811434	3.2242	19.3289	0.624035			4.13458		14.469
	19.5789	0.5003	778.48	25.1333	3.2242	500	375.784	12.1322	35.0728	96.0239		1.0266	566.876	18.3017	0.590872	2.90699	11.1081	0.358627			2.95599		11.7736
20	19.5789	0.5208	756.206	24.4142	3.19517	600	361.42	11.6685	36.5865	96.1377	95.5878	1.0926	566.876	18.3017	0.590872	2.90699	10.6768	0.344704			2.95414	3.34824	11.3238
	39.1579	0.5047	2215.16	71.5168	4.26993	700	731.974	23.6319	37.8663	94.343		1.0663	1313.06	42.3923	1.36864	3.74697	25.0128	0.807542			3.41717		22.8243
	39.1579	0.5138	2170.61	70.0785	4.24962	800	719.877	23.2413	38.975	94.4568		1.062	1223.96	39.5158	1.27577	3.6767	22.8117	0.73648			3.16884		22.5049
40	39.1579	0.5234	2471.31	79.7867	4.37936	900	700.928	22.6296	39.9529	93.6889	94.1629	1.0316	1379.88	44.5497	1.43829	3.7966	25.3041	0.816945			3.61008	3.3987	21.8126
	58.7368	0.5143	11055	356.614	5.87665	1000	927.121	29.9071	40.8276	81.1787		1.09	2226.3	71.8763	2.32054	4.27495	33.4052	1.07849			3.60311		28.8286
	58.7368	0.5034	11266.9	363.449	5.89564	1100	942.986	30.4189	41.619	80.818		1.1053	2460.18	79.4271	2.56432	4.37484	38.3412	1.23785			4.06594		29.1811
60	58.7368	0.5267	11571.8	373.283	5.92234	1200	895.483	28.8865	42.3414	80.299	80.7652	1.1062	2014.69	65.0447	2.09998	4.17507	27.7361	0.895464			3.09734	3.5888	27.9911
	97.8947	0.5017	33277.9	1074.38	6.9795		1287.96	41.5819		66.0065		1.2068	3462.51	111.788	3.60908	4.7166	27.1124	0.875329			2.10507		40.7066
	97.8947	0.4949	32960	1064.12	6.9699		1312.08	42.3606		66.3312		1.2825	3651.84	117.9	3.80643	4.76984	27.1475	0.876461			2.06905		41.4842
100	97.8947	0.5005	34655.2	1118.85	7.02005		1263.53	40.7932		64.5996	65.6457	1.1539	3963.68	127.968	4.13146	4.85178	39.1268	1.26321			3.09663	2.42358	39.53
